# Supplementary material
Source: PubMed Central journal article supplement (PMC4867112)
Supplement: NIHMS784443-supplement-supplemental.pdf [file NIHMS784443-supplement-supplemental.pdf]

Supplementary data

**Table S1.** ITC parameters recovered for Tb<sup>3+</sup> displacement of Ca<sup>2+</sup> from EF hands of CaM and DREAM using a set of sites model

|                                  | <b>n</b>  | <b>K<sub>1</sub> x 10<sup>5</sup></b> | <b>ΔH<sub>1</sub></b> | <b>-TΔS<sub>1</sub></b> |
|----------------------------------|-----------|---------------------------------------|-----------------------|-------------------------|
| DREAM(Δ64)                       | 4.4 ± 0.9 | 4.8 ± 0.6                             | 6 ± 0.6               | 14 ± 0.6                |
| DREAM(Δ64) + Mg <sup>2+</sup>    | 3.6 ± 0.7 | 3.2 ± 0.5                             | 9 ± 0.1               | 16 ± 0.2                |
| DREAM (Δ160)                     | 2.4 ± 0.1 | 0.7 ± 0.2                             | 9 ± 0.2               | 15 ± 0.3                |
| DREAM (Δ160) + Mg <sup>2+</sup>  | 2.2 ± 0.1 | 0.4 ± 0.1                             | 8 ± 0.9               | 14 ± 1.0                |
| DREAM (E234Q) + Mg <sup>2+</sup> | 4.8 ± 0.9 | 1.9 ± 0.2                             | 4 ± 0.2               | 11 ± 0.2                |
| DREAM (E186Q) + Mg <sup>2+</sup> | 4.5 ± 0.2 | 4.3 ± 0.5                             | 5 ± 0.1               | 13 ± 0.1                |

All Experiments conducted in triplicate at 25 °C, errors are standard deviations. Enthalpy and entropy changes shown in kcal·mol<sup>-1</sup>, association constants in M<sup>-1</sup>.
